# Supplementary material for: Formation of glutathione sulfenate and sulfinate complexes by an organoiridium(iii) anticancer complex
Source: Royal Society of Chemistry journal article supplement (doi:10.1039/c4qi00098f), 2014-09-24
Supplement: c4qi00098f1.pdf [file c4qi00098f1.pdf]

**Formation of glutathione sulfenate and sulfinato complexes by an organoiridium(III) anticancer complex**

Zhe Liu<sup>§</sup>, Peter J. Sadler\*

Department of Chemistry, University of Warwick, Gibbet Hill Road, Coventry, CV4 7AL, U.K.

<sup>§</sup>Current address: Department of Chemistry, University of Basel, Spitalstrasse 51, 4056 Basel, Switzerland

\*e-mail: [p.j.sadler@warwick.ac.uk](mailto:p.j.sadler@warwick.ac.uk)

**Support Information**

Experimental

Figures S1 and S2

**Materials.** L-glutathione reduced (GSH),  $\beta$ -nicotinamide adenine dinucleotide reduced dipotassium salt (NADH), H<sub>2</sub>O<sub>2</sub> (30%), quantofix peroxides test sticks, and catalase from bovine liver (aqueous suspension) were purchased from Sigma-Aldrich. ROS/superoxide detection kit was purchased from Enzo-Life sciences.

$[(\eta^5\text{-Cp}^{\text{xbiph}})\text{Ir}(\text{phpy})\text{py}]^+$  (**Ir-py**) was synthesized as described previously.<sup>1</sup>

### **Methods and Instrumentation.**

**NMR Spectroscopy.** <sup>1</sup>H NMR spectra were acquired in 5 mm NMR tubes at 298 K or 310 K on either a Bruker DPX 400 (<sup>1</sup>H = 400.03 MHz) or AVA 600 (<sup>1</sup>H = 600.13 MHz) spectrometers. <sup>1</sup>H NMR chemical shifts were internally referenced to CHD<sub>2</sub>OD (3.33 ppm) for methanol-*d*<sub>4</sub>. MeOD-*d*<sub>4</sub> was used to aid solubility. All data processing was carried out using MestReC or TOPSPIN version 2.0 (Bruker U.K. Ltd.).

**Electrospray Ionization Mass Spectrometry (ESI-MS).** Electrospray ionization mass spectra were obtained by using NMR samples for infusion into the mass spectrometer (Bruker Esquire 2000). The mass spectra were recorded with a scan range of *m/z* 400–1000 for positive ions.

**pH Measurement.** pH or pH\* (pH meter reading without correction for effects of deuterium on glass electrode) values of NMR samples in H<sub>2</sub>O or D<sub>2</sub>O were measured at ca. 298 K directly in the NMR tube, before and after recording NMR spectra, using a Corning 240 pH meter equipped with a micro combination electrode calibrated with Aldrich buffer solutions of pH 4, 7 and 10.

**Stability of Ir-SG in NaCl solution.** NaCl was added to an NMR tube containing a ca. 0.8 mM solution of complex **Ir-SG** in 30% MeOD-*d*<sub>4</sub>/70% D<sub>2</sub>O to prepare a solution containing 104 mM NaCl. <sup>1</sup>H NMR spectra of the resulting solutions were recorded at 310 K and various time intervals for 17 h.

**Interaction of Ir-py with GSH.** GSH (3.5 mol equiv) was added to an NMR tube containing a 0.6 mM solution of complex **Ir-py** in 30% MeOD-*d*<sub>4</sub>/70% PBS buffer

(H<sub>2</sub>O) at ambient temperature, pH = 7.4. <sup>1</sup>H NMR spectra of the resulting solutions were recorded at 310 K and various time intervals for 12 h.

**Interactions with NADH.** NADH (2 mol equiv) was added to an NMR tube containing 95% **Ir-SG** and 5% **Ir-py**. <sup>1</sup>H NMR spectra of the resulting solutions at different conditions were recorded at 310 K.

**Detection of H<sub>2</sub>O<sub>2</sub>.** To a solution of **Ir-SG** (produced by reaction of 0.6 mM **Ir-py** with 3.5 mol equiv GSH in 30% MeOD-*d*<sub>4</sub>/70% PBS H<sub>2</sub>O buffer (v/v) at 310 K), 2 mol equiv NADH were added. After 48 h, H<sub>2</sub>O<sub>2</sub> was detected by quantofix peroxide test sticks.

**Oxidation of Ir-SG by H<sub>2</sub>O<sub>2</sub>.** **Ir-SG** solution was prepared from the reaction of **1-py** (1 mM) with 3.5 mol equiv of GSH in 30% MeOD-*d*<sub>4</sub>/70% PBS D<sub>2</sub>O buffer (v/v) at 310 K, pH\* = 7.4. H<sub>2</sub>O<sub>2</sub> (10 mol equiv) was added to the above solution. <sup>1</sup>H NMR spectra of the resulting solutions were recorded at 310 K and various time intervals for 24 h.

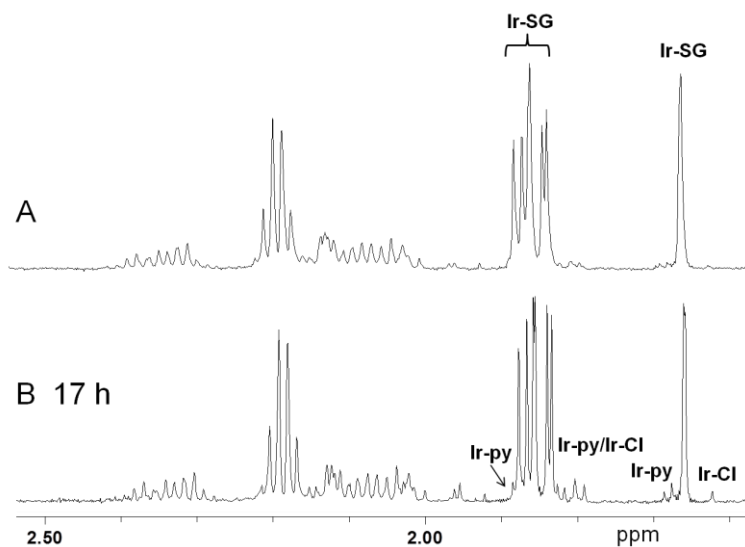

**Figure S1.** <sup>1</sup>H NMR spectra showing the stability of **Ir-SG** in the presence of 104 mM of NaCl. (A) Addition of NaCl (104 mM) to **Ir-SG** solution generated from the reaction between **Ir-py** (0.8 mM) and 3.5 mol equiv of GSH in 30% MeOD-*d*<sub>4</sub>/70% phosphate D<sub>2</sub>O buffer (v/v) at 310 K, pH\* = 7.4. (B) 17 h later, 90% of the Ir was in the form of **Ir-SG** and 10% was present as **Ir-Cl** and **Ir-py**.

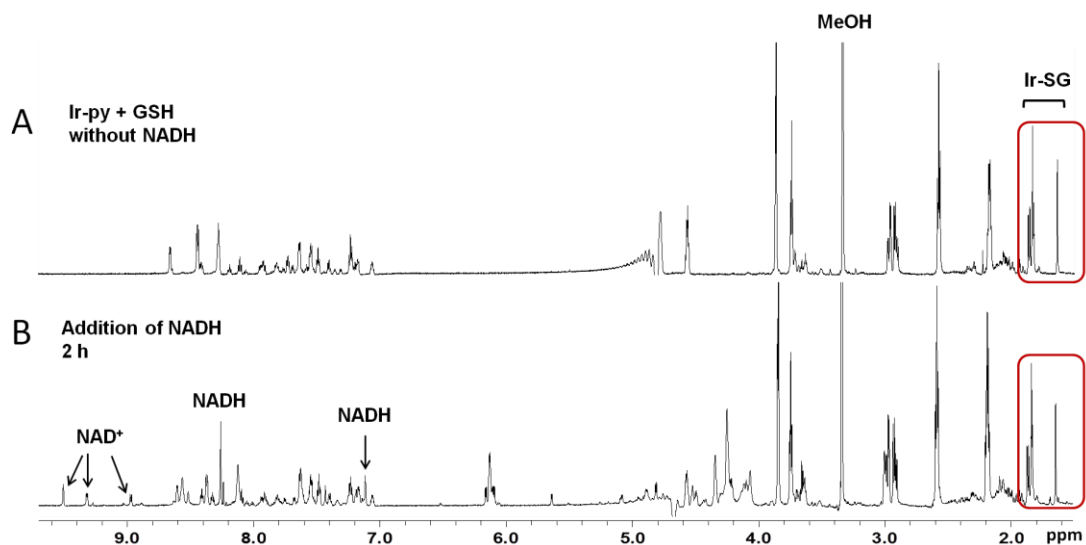

**Figure S2.**  $^1\text{H}$  NMR spectra showing the reaction of NADH with **Ir-SG** in 30% MeOD- $d_4$ /70% PBS H $_2$ O buffer (v/v) at 310 K, deoxygenated under N $_2$ . (A) Formation of **Ir-SG** produced by reaction of **Ir-py** (1.2 mM) with GSH (6 mM); (B) 2 h after addition of NADH (1.5 mol equiv) to the above equilibrium solution. The reaction produced NAD $^+$ , however, no sulfenato complex **Ir-S(O)G** was generated. Peak assignments are shown. Little change occurs to the Cp $^{\text{xbiph}}$  methyl peaks (red boxes).

## Reference

(1) Liu, Z.; Romero-Canelón, I.; Qamar, B.; Hearn, J. M.; Habtemariam, A.; Barry, N. P. E.; Pizarro, A. M.; Clarkson, G. J.; Sadler, P. J. *Angew. Chem. Int. Ed.* **2014**, *53*, 3941-3946.
